# Supplementary material for: Cities through the Prism of People’s Spending Behavior
Source: PubMed Central journal article supplement (PMC4743849; doi:10.1371/journal.pone.0146291), 2016-02-05
Supplement: pone.0146291.s001.pdf [file pone.0146291.s001.pdf]

## S1 Text. Demographic normalization

Let us describe the normalization procedure used to account for demographic discrepancies between cities. The idea is to compare the observed value of a given parameter with its theoretical expected one (computed using the city demographic profile). Let  $(p_c)_{c \in C}$  be the measured parameter where  $C$  denotes the entire set of customers,  $C_X$  the subset containing only customers from city X and  $C_{g,a}$  the customers of gender  $g$  and age  $a$ . The average quantity for a given gender  $g$  and age  $a$  and for a given city X are

$$Q_{g,a} = \frac{\sum_{c \in C_{g,a}} p_c}{|C_{g,a}|} \quad Q_X = \frac{\sum_{c \in C_X} p_c}{|C_X|}$$

The expected value of the parameter based on the demography of city X is

$$E_X = \frac{\sum_{g,a} |C_X \cap C_{g,a}| Q_{g,a}}{|C_X|}$$

In the end, the normalized value used as a measure of city X economic behavior is  $\frac{Q_X}{E_X}$
