# Supplementary material for: Cities through the Prism of People’s Spending Behavior
Source: PubMed Central journal article supplement (PMC4743849; doi:10.1371/journal.pone.0146291), 2016-02-05
Supplement: pone.0146291.s003.pdf [file pone.0146291.s003.pdf]

**S1 Table. Scaling of the five characteristics of individual spending behavior with city size.**

| Parameter       | City definition | Exponen | Confidence intervals | p-value  | $R^2$  |
|-----------------|-----------------|---------|----------------------|----------|--------|
| Activity        | LUZ             | 1.052   | [1.0,1.1]            | 5e-23 %  | 98.90% |
|                 | FUA             | 1.044   | [1.0,1.08]           | 1e-37 %  | 98.71% |
|                 | CON             | 1.045   | [1.03,1.06]          | 4e-205 % | 99.0%  |
| Avg. amount     | LUZ             | -0.006  | [-0.05,0.03]         | 75.3 %   | 0.46%  |
|                 | FUA             | 0.005   | [-0.03,0.04]         | 78.2 %   | 0.2 %  |
|                 | CON             | 0.01    | [-0.005,0.03]        | 18.9 %   | 0.8%   |
| Diversity Herf. | LUZ             | 0.057   | [0.016,0.099]        | 0.85 %   | 27.51% |
|                 | FUA             | 0.064   | [0.034,0.093]        | 9e-5 %   | 33.29% |
|                 | CON             | 0.080   | [0.066,0.095]        | 6e-22 %  | 36.16% |
| Distant mob.    | LUZ             | -0.128  | [-0.26,0.0]          | 5.76 %   | 15.4%  |
|                 | FUA             | -0.007  | [-0.13,0.11]         | 89.2%    | 5e-4%  |
|                 | CON             | 0.130   | [0.08,0.18]          | 8e-8 %   | 13.0%  |
| Local mob.      | LUZ             | -0.059  | [-0.19,0.07]         | 36.1 %   | 3.8%   |
|                 | FUA             | -0.026  | [-0.14,0.09]         | 63.9 %   | 0.6%   |
|                 | CON             | -0.076  | [-0.12,-0.03]        | 0.02 %   | 6.38%  |
